# Supplementary material
Source: HighWire-hosted journal article supplement (https://rmdopen.bmj.com/content/8/1/e002195)
Supplement: inline-supplementary-material-1 [file inline-supplementary-material-1.pdf]

**Supplemental Table 1. Odds ratios and 95% confidence intervals comparing ACR20<sup>a</sup>, ACR50<sup>b</sup>, and ACR70<sup>c</sup> responses at Week 24 between guselkumab and placebo within patient subgroups defined by baseline demographics, disease characteristics, and DMARD use at baseline among pooled DISCOVER-1 and DISCOVER-2 patients. Prior to Week 24, patients meeting treatment failure criteria were considered non-responders. Missing data through Weeks 24 and 52 were imputed as non-response.**

|                               | ACR20 Response <sup>a</sup> |                 | ACR50 Response <sup>b</sup> |                 | ACR70 Response <sup>c</sup> |                 |
|-------------------------------|-----------------------------|-----------------|-----------------------------|-----------------|-----------------------------|-----------------|
|                               | GUS 100 mg Q4W              | GUS 100 mg Q8W  | GUS 100 mg Q4W              | GUS 100 mg Q8W  | GUS 100 mg Q4W              | GUS 100 mg Q8W  |
|                               | Odds Ratio (95% CI)         |                 |                             |                 |                             |                 |
| <b>All patients</b>           | 4.0 (2.9, 5.4)              | 3.6 (2.7, 4.9)  | 3.7 (2.5, 5.3)              | 3.2 (2.2, 4.6)  | 3.8 (2.2, 6.7)              | 4.1 (2.3, 7.1)  |
| <b>Sex</b>                    |                             |                 |                             |                 |                             |                 |
| Male                          | 4.2 (2.8, 6.5)              | 3.5 (2.3, 5.4)  | 3.9 (2.4, 6.4)              | 3.2 (1.9, 5.4)  | 3.4 (1.7, 6.9)              | 3.6 (1.8, 7.3)  |
| Female                        | 3.5 (2.3, 5.5)              | 3.7 (2.4, 5.7)  | 3.2 (1.8, 5.6)              | 3.0 (1.7, 5.4)  | 4.3 (1.7, 11.0)             | 4.6 (1.8, 11.7) |
| <b>BMI (kg/m<sup>2</sup>)</b> |                             |                 |                             |                 |                             |                 |
| <25                           | 4.2 (2.3, 7.7)              | 2.4 (1.4, 4.3)  | 4.3 (2.1, 9.1)              | 3.3 (1.6, 6.8)  | 6.6 (2.2, 20.0)             | 4.5 (1.5, 13.9) |
| 25 to <30                     | 4.4 (2.6, 7.5)              | 4.1 (2.4, 6.9)  | 2.9 (1.6, 5.4)              | 2.8 (1.5, 5.1)  | 2.5 (1.1, 5.8)              | 3.4 (1.5, 7.7)  |
| ≥30                           | 3.7 (2.3, 5.9)              | 4.3 (2.6, 7.0)  | 4.2 (2.2, 8.1)              | 3.6 (1.9, 7.0)  | 4.6 (1.5, 13.8)             | 5.1 (1.7, 15.4) |
| <b>Swollen joint count</b>    |                             |                 |                             |                 |                             |                 |
| <10                           | 5.1 (3.3, 7.8)              | 3.3 (2.2, 5.0)  | 5.5 (3.2, 9.2)              | 4.1 (2.4, 6.9)  | 6.4 (2.9, 14.0)             | 5.1 (2.3, 11.3) |
| 10-15                         | 3.1 (1.7, 5.5)              | 4.1 (2.3, 7.4)  | 2.5 (1.3, 5.0)              | 2.1 (1.0, 4.2)  | 2.2 (0.7, 6.8)              | 2.3 (0.7, 6.8)  |
| >15                           | 3.2 (1.6, 6.2)              | 4.1 (2.1, 8.2)  | 2.1 (0.8, 5.2)              | 2.9 (1.2, 7.2)  | 1.4 (0.4, 5.3)              | 4.2 (1.3, 13.4) |
| <b>Tender joint count</b>     |                             |                 |                             |                 |                             |                 |
| <10                           | 7.9 (3.5, 17.7)             | 4.5 (2.1, 9.8)  | 9.9 (3.5, 27.6)             | 6.3 (2.2, 17.9) | 10.3 (2.3, 46.2)            | 9.2 (2.0, 41.6) |
| 10-15                         | 4.7 (2.6, 8.4)              | 3.5 (2.0, 6.0)  | 4.7 (2.4, 9.2)              | 3.3 (1.7, 6.4)  | 5.2 (1.9, 14.5)             | 3.8 (1.4, 10.7) |
| >15                           | 3.0 (2.0, 4.5)              | 3.5 (2.3, 5.3)  | 2.2 (1.3, 3.7)              | 2.5 (1.5, 4.2)  | 1.9 (0.9, 4.3)              | 3.0 (1.4, 6.5)  |
| <b>PsA duration (years)</b>   |                             |                 |                             |                 |                             |                 |
| <1                            | 3.6 (1.7, 7.9)              | 6.8 (3.0, 14.9) | 6.3 (2.2, 18.0)             | 7.4 (2.6, 20.7) | 5.3 (1.1, 25.4)             | 9.0 (2.0, 40.8) |
| ≥1 to <3                      | 6.2 (3.2, 11.8)             | 4.0 (2.1, 7.4)  | 5.3 (2.5, 11.4)             | 3.4 (1.5, 7.3)  | 7.0 (2.3, 21.3)             | 3.2 (1.0, 10.5) |
| ≥3                            | 3.5 (2.4, 5.2)              | 2.9 (2.0, 4.3)  | 2.8 (1.7, 4.5)              | 2.4 (1.5, 3.9)  | 2.7 (1.3, 5.6)              | 3.3 (1.6, 6.8)  |
| <b>CRP (mg/dL)</b>            |                             |                 |                             |                 |                             |                 |
| <1                            | 4.0 (2.6, 6.1)              | 3.7 (2.4, 5.6)  | 4.5 (2.6, 7.7)              | 3.9 (2.2, 6.7)  | 6.6 (2.7, 16.1)             | 5.9 (2.4, 14.6) |
| 1 to <2                       | 8.3 (3.9, 17.6)             | 7.7 (3.6, 16.7) | 5.9 (2.4, 14.5)             | 4.6 (1.8, 11.6) | 4.9 (1.0, 23.3)             | 5.8 (1.2, 27.5) |
| ≥2                            | 2.5 (1.4, 4.4)              | 2.4 (1.4, 4.0)  | 1.9 (1.0, 3.8)              | 2.0 (1.0, 3.7)  | 1.7 (0.7, 4.3)              | 2.4 (1.0, 5.6)  |
| <b>csDMARD/MTX use</b>        |                             |                 |                             |                 |                             |                 |
| None                          | 6.6 (3.7, 11.6)             | 5.6 (3.2, 9.8)  | 4.9 (2.4, 9.8)              | 5.0 (2.5, 10.1) | 10.0 (2.9, 34.1)            | 9.9 (2.9, 33.7) |
| Any csDMARD                   | 3.2 (2.2, 4.6)              | 3.0 (2.1, 4.3)  | 3.2 (2.1, 5.1)              | 2.6 (1.6, 4.0)  | 2.6 (1.3, 5.0)              | 2.8 (1.5, 5.4)  |
| MTX                           | 3.6 (2.4, 5.3)              | 2.8 (1.9, 4.2)  | 3.4 (2.1, 5.4)              | 2.3 (1.4, 3.8)  | 3.1 (1.5, 6.4)              | 3.3 (1.6, 6.8)  |

<sup>a,b,c</sup>≥20%, ≥50%, and ≥70%, respectively, improvement from baseline in both tender joint count (68 joints) and swollen joint count (66 joints), and ≥20%, ≥50%, and ≥70%, respectively, improvement from baseline in at least 3 of the 5 assessments: patient's assessment of pain, patient's global assessment of disease activity, physician's global assessment of disease activity, HAQ-DI, and CRP.

ACR20/50/70=American College of Rheumatology 20/50/70% improvement, BMI=Body mass index, CI=confidence interval, CRP=C-reactive protein, csDMARD=Conventional synthetic disease-modifying antirheumatic drug, GUS=Guselkumab, MTX=Methotrexate, PsA=Psoriatic arthritis, Q4W/Q8W=every four weeks/every eight weeks
