# Supplementary material
Source: HighWire-hosted journal article supplement (https://rmdopen.bmj.com/content/8/1/e002195)
Supplement: inline-supplementary-material-4 [file inline-supplementary-material-4.pdf]

**Supplemental Table 4. Odds ratios and 95% confidence intervals comparing disease activity state (PASDAS LDA response<sup>a</sup> and MDA response<sup>b</sup>) at week 24 between guselkumab and placebo within patient subgroups defined by baseline demographics, disease characteristics, and DMARD use at baseline among pooled DISCOVER-1 and DISCOVER-2 patients. Prior to Week 24, patients meeting treatment failure criteria were considered non-responders. Missing data through Weeks 24 and 52 were imputed as non-response.**

|                                      | PASDAS LDA Response <sup>a</sup> |                  | MDA Response <sup>b</sup> |                   |
|--------------------------------------|----------------------------------|------------------|---------------------------|-------------------|
|                                      | Odds Ratio (95% CI)              |                  |                           |                   |
|                                      | GUS 100 mg Q4W                   | GUS 100 mg Q8W   | GUS 100 mg Q4W            | GUS 100 mg Q8W    |
| <b>All patients</b>                  | 4.0 (2.6, 6.1)                   | 4.4 (2.9, 6.7)   | 3.5 (2.2, 5.5)            | 3.8 (2.4, 5.9)    |
| <b>Sex</b>                           |                                  |                  |                           |                   |
| Male                                 | 3.7 (2.2, 6.4)                   | 3.9 (2.3, 6.8)   | 4.8 (2.5, 9.1)            | 4.9 (2.6, 9.4)    |
| Female                               | 4.1 (2.0, 8.2)                   | 5.1 (2.6, 10.1)  | 2.3 (1.2, 4.4)            | 2.8 (1.5, 5.3)    |
| <b>BMI (kg/m<sup>2</sup>)</b>        |                                  |                  |                           |                   |
| <25                                  | 4.4 (1.9, 10.3)                  | 4.5 (1.9, 10.4)  | 4.1 (1.7, 10.1)           | 4.0 (1.7, 9.9)    |
| 25 to <30                            | 3.1 (1.6, 6.1)                   | 3.8 (2.0, 7.2)   | 3.0 (1.4, 6.2)            | 4.2 (2.1, 8.4)    |
| ≥30                                  | 4.9 (2.4, 10.2)                  | 5.4 (2.6, 11.3)  | 3.7 (1.8, 7.9)            | 3.3 (1.5, 7.0)    |
| <b>Swollen joint count</b>           |                                  |                  |                           |                   |
| <10                                  | 4.9 (2.9, 8.3)                   | 4.2 (2.5, 7.2)   | 4.3 (2.5, 7.4)            | 3.6 (2.1, 6.3)    |
| 10-15                                | 2.9 (1.2, 6.9)                   | 4.1 (1.8, 9.7)   | 2.7 (1.0, 7.3)            | 3.7 (1.4, 9.7)    |
| >15                                  | 3.4 (0.9, 13.0)                  | 6.7 (1.9, 24.2)  | 2.3 (0.6, 9.2)            | 5.2 (1.4, 19.0)   |
| <b>Tender joint count</b>            |                                  |                  |                           |                   |
| <10                                  | 4.7 (2.0, 10.7)                  | 3.6 (1.6, 8.3)   | 3.8 (1.6, 9.0)            | 3.2 (1.4, 7.7)    |
| 10-15                                | 4.1 (2.0, 8.2)                   | 3.6 (1.8, 7.1)   | 5.1 (2.4, 10.8)           | 3.8 (1.8, 8.0)    |
| >15                                  | 3.8 (1.8, 8.3)                   | 6.4 (3.0, 13.6)  | 2.1 (0.9, 4.9)            | 4.2 (1.9, 9.0)    |
| <b>PsA duration (years)</b>          |                                  |                  |                           |                   |
| <1                                   | 2.5 (0.9, 7.0)                   | 5.7 (2.1, 15.0)  | 1.7 (0.7, 4.3)            | 2.6 (1.1, 6.2)    |
| ≥1 to <3                             | 7.6 (3.0, 19.6)                  | 5.2 (2.0, 13.5)  | 4.2 (1.6, 11.2)           | 4.1 (1.5, 10.7)   |
| ≥3                                   | 3.5 (2.1, 6.0)                   | 3.8 (2.2, 6.5)   | 4.3 (2.3, 8.0)            | 4.3 (2.3, 8.0)    |
| <b>BSA affected by psoriasis (%)</b> |                                  |                  |                           |                   |
| <3                                   | 2.8 (1.1, 7.3)                   | 3.2 (1.3, 8.1)   | 1.9 (0.8, 4.8)            | 1.5 (0.6, 3.8)    |
| ≥3 to <10                            | 2.9 (1.5, 5.7)                   | 3.6 (1.9, 6.9)   | 2.7 (1.3, 5.6)            | 2.9 (1.4, 5.8)    |
| ≥10 to <20                           | 4.1 (1.6, 10.7)                  | 3.1 (1.1, 8.6)   | 4.9 (1.6, 15.2)           | 4.4 (1.4, 14.2)   |
| ≥20                                  | 8.7 (3.2, 23.4)                  | 11.3 (4.2, 30.5) | 9.5 (2.8, 32.8)           | 15.4 (4.5, 52.5)  |
| <b>CRP (mg/dL)</b>                   |                                  |                  |                           |                   |
| <1                                   | 3.8 (2.2, 6.6)                   | 4.8 (2.8, 8.3)   | 3.8 (2.1, 6.8)            | 4.2 (2.3, 7.6)    |
| 1 to <2                              | 13.2 (3.0, 58.6)                 | 12.1 (2.7, 54.7) | 4.9 (1.6, 15.3)           | 3.5 (1.1, 11.4)   |
| ≥2                                   | 2.4 (1.1, 5.3)                   | 2.7 (1.3, 5.7)   | 2.0 (0.8, 5.0)            | 3.3 (1.4, 7.6)    |
| <b>PASI score at baseline (0-72)</b> |                                  |                  |                           |                   |
| <12                                  | 2.8 (1.7, 4.4)                   | 3.2 (2.0, 5.1)   | 2.6 (1.6, 4.2)            | 2.8 (1.7, 4.5)    |
| ≥12 to <20                           | 6.8 (1.9, 24.9)                  | 7.2 (1.9, 27.2)  | 13.6 (1.7, 108.5)         | 12.3 (1.5, 101.6) |
| ≥20                                  | NC (NC, NC)                      | NC (NC, NC)      | 17.3 (2.2, 136.5)         | 24.0 (3.0, 190.9) |
| <b>csDMARD/MTX use</b>               |                                  |                  |                           |                   |
| None                                 | 4.2 (2.1, 8.5)                   | 4.6 (2.3, 9.4)   | 4.0 (1.8, 8.8)            | 4.9 (2.2, 10.7)   |
| Any csDMARD                          | 3.9 (2.3, 6.5)                   | 4.3 (2.6, 7.3)   | 3.3 (1.9, 5.6)            | 3.3 (1.9, 5.7)    |
| MTX                                  | 4.4 (2.5, 7.8)                   | 4.0 (2.3, 7.2)   | 3.9 (2.2, 6.9)            | 3.3 (1.8, 6.0)    |

<sup>a</sup>PASDAS score ≤3.2. The PASDAS score is calculated from a combination of the tender and swollen joint counts, Physical Component Summary Short Form-36 score, physician's global assessment of disease activity, patient's global assessment of disease activity (arthritis and psoriasis), enthesitis, dactylitis count, and CRP.

<sup>b</sup>5/7 MDA criteria are met (tender joint count ≤1, swollen joint count ≤1, psoriasis activity and severity index ≤1, patient's assessment of pain ≤15, patient's global assessment of disease activity ≤20, Health Assessment Questionnaire-Disability Index score ≤0.5, Tender enthesal points ≤1).

BMI=Body mass index, BSA=Body surface area, CI=confidence interval, CRP=C-reactive protein, csDMARD=Conventional synthetic disease-modifying antirheumatic drug, GUS=Guselkumab, LDA=Low disease activity, MDA=Minimal disease activity, MTX=Methotrexate, PASDAS=Psoriatic Arthritis Disease Activity Score, PASI=Psoriasis Area and Severity Index, PsA=Psoriatic arthritis, Q4W/Q8W=every four weeks/every eight weeks
